# Supplementary material
Source: publisher figshare collection journal article supplement (https://acs.figshare.com/ndownloader/files/13256606)
Supplement: Supplementary file 1 [file 13256606]

# Supporting Information

## Deformation Mechanism of Poly(3-alkylthiophene) Studied by *in Situ* X-ray

### Scattering and Texture Analysis

Haiming Chen,<sup>†,‡</sup> Cui Su,<sup>†,‡</sup> Guangyu Shi,<sup>†,‡</sup> Xiaolu Li,<sup>§</sup> Xiuqin Zhang,<sup>§</sup> Guoming Liu,<sup>\*,†</sup> and  
Dujin Wang<sup>†,‡</sup>

<sup>†</sup> CAS Key Laboratory of Engineering Plastics, CAS Research/Education Center for Excellence in Molecular Sciences, Institute of Chemistry, Chinese Academy of Sciences, Beijing 100190, China

<sup>‡</sup> University of Chinese Academy of Sciences, Beijing 100049, China

<sup>§</sup> Beijing Key Laboratory of Clothing Materials R & D and Assessment, Beijing Engineering Research Center of Textile Nanofiber, School of Materials Science & Engineering, Beijing Institute of Fashion Technology, Beijing 100029, China

Corresponding author: [gmliu@iccas.ac.cn](mailto:gmliu@iccas.ac.cn)

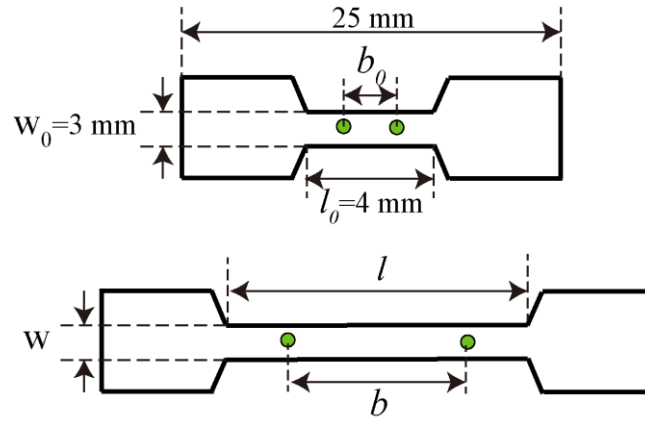

**Figure S1.** The dimension and marker points (green circles) on the surface of mini tensile bar before and after stretching.

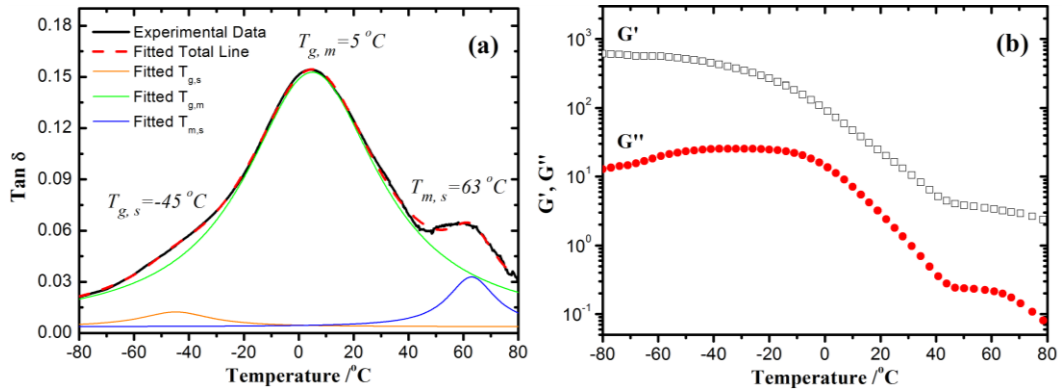

**Figure S2.** The (a)  $\tan \delta$  and (b) storage modulus ( $G'$ ), loss storage ( $G''$ ) of P3DDT film obtained from dynamic mechanical analysis (DMA) measurement. DMA was carried out with a TA Q800 instrument employing uniaxial tension mode. The temperature scan rate was 3 °C/min and the scan range was -100 °C ~ 100 °C. The dimension of the specimen was 11.90 mm  $\times$  5.92 mm  $\times$  0.06 mm (length  $\times$  width  $\times$  thickness). The frequency was fixed at 1 Hz. A strain of 0.1 % was chosen which was located in the linear viscoelastic regime.

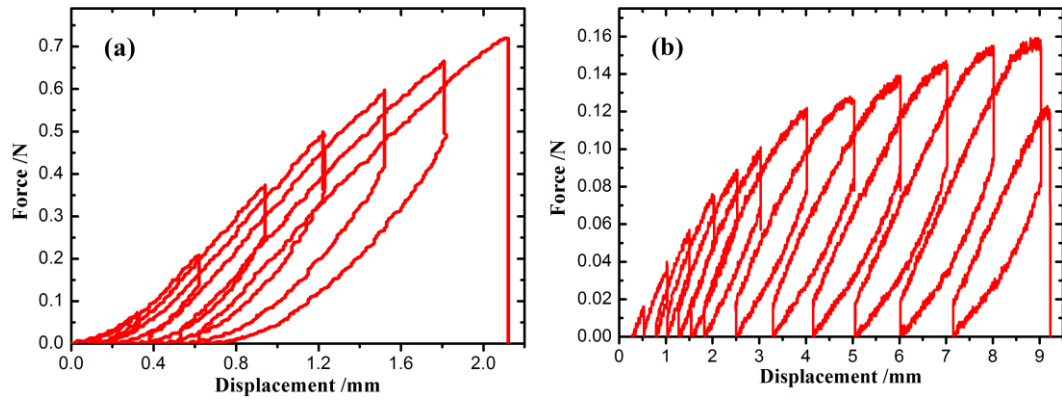

**Figure S3.** Force-displacement curves of the step-cycle measurements of P3DDT at 30 °C (a) and 110 °C (b), respectively.

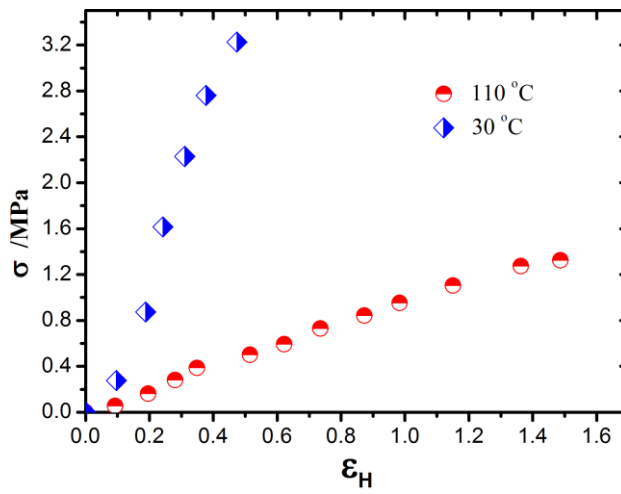

**Figure S4.** True stress ( $\sigma$ )-strain ( $\epsilon_H$ ) plots of P3DDT film at 30 °C and 110 °C, respectively.

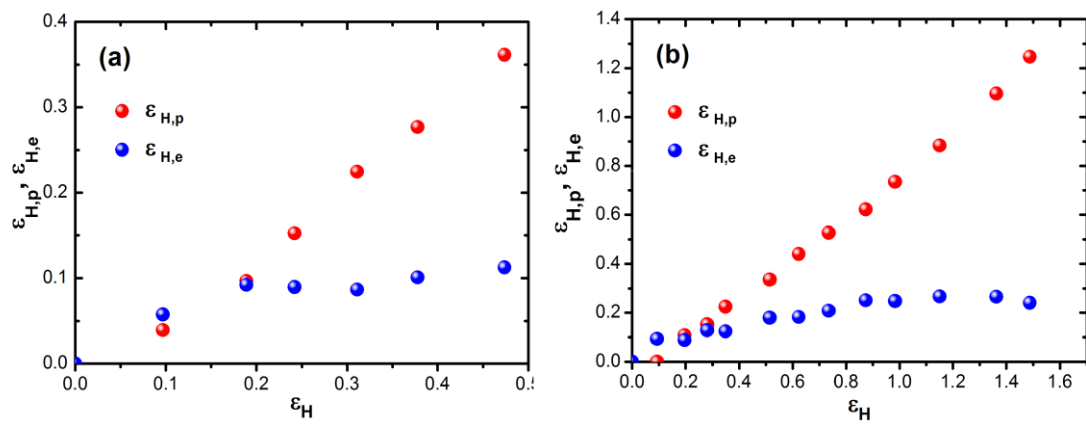

**Figure S5.** Elastic ( $\epsilon_{H,e}$ ) and plastic ( $\epsilon_{H,p}$ ) strain as a function of total strain ( $\epsilon_H$ ) of P3DDT at (a) 30 °C and (b) 110 °C, respectively.

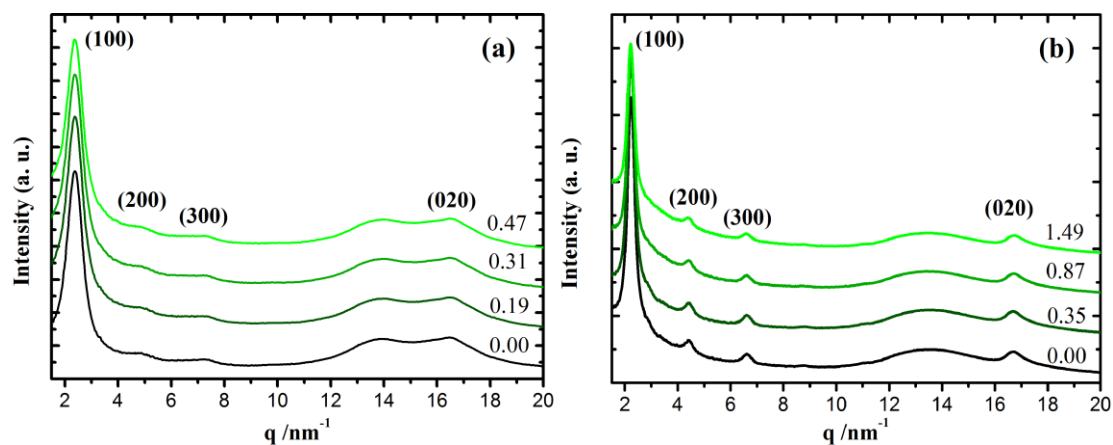

**Figure S6.** 1D WAXS intensity profiles of P3DDT upon stretching at 30 °C (a) and 110 °C (b), respectively.

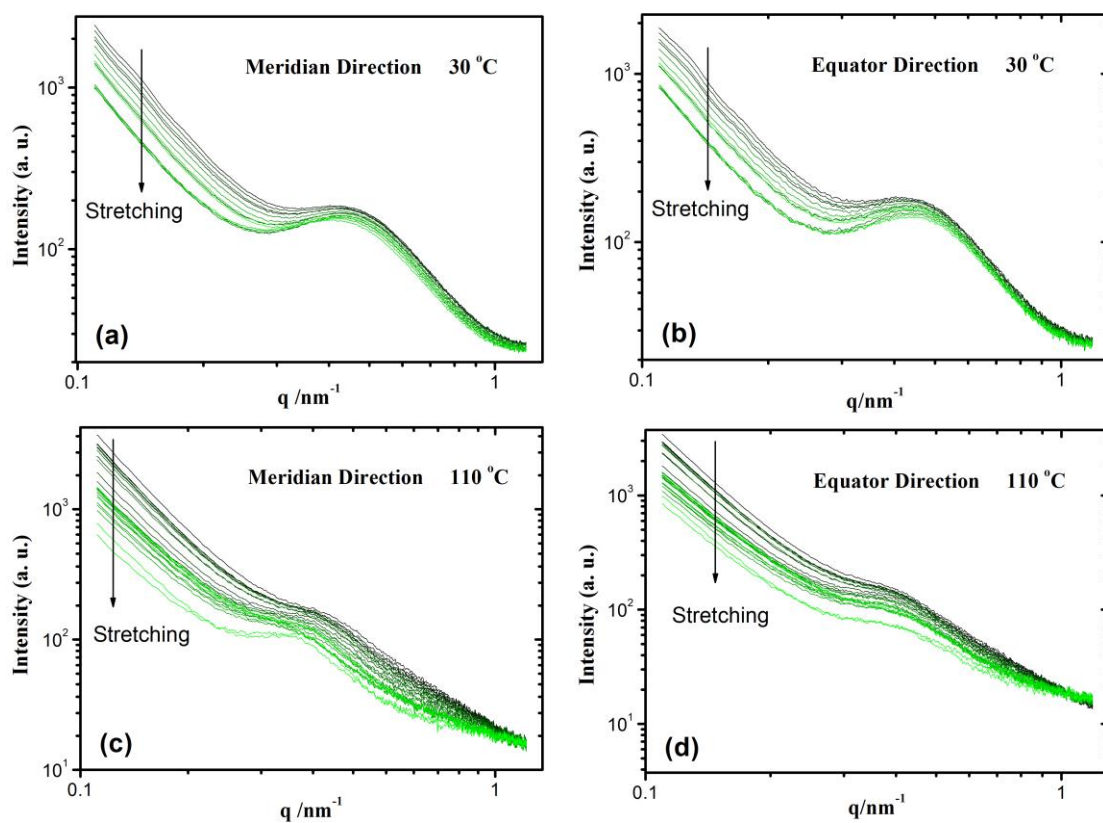

**Figure S7.** 1D SAXS intensity profiles of P3DDT under uniaxial stretching at 30 °C (a)-(b) and 110 °C (c)-(d).

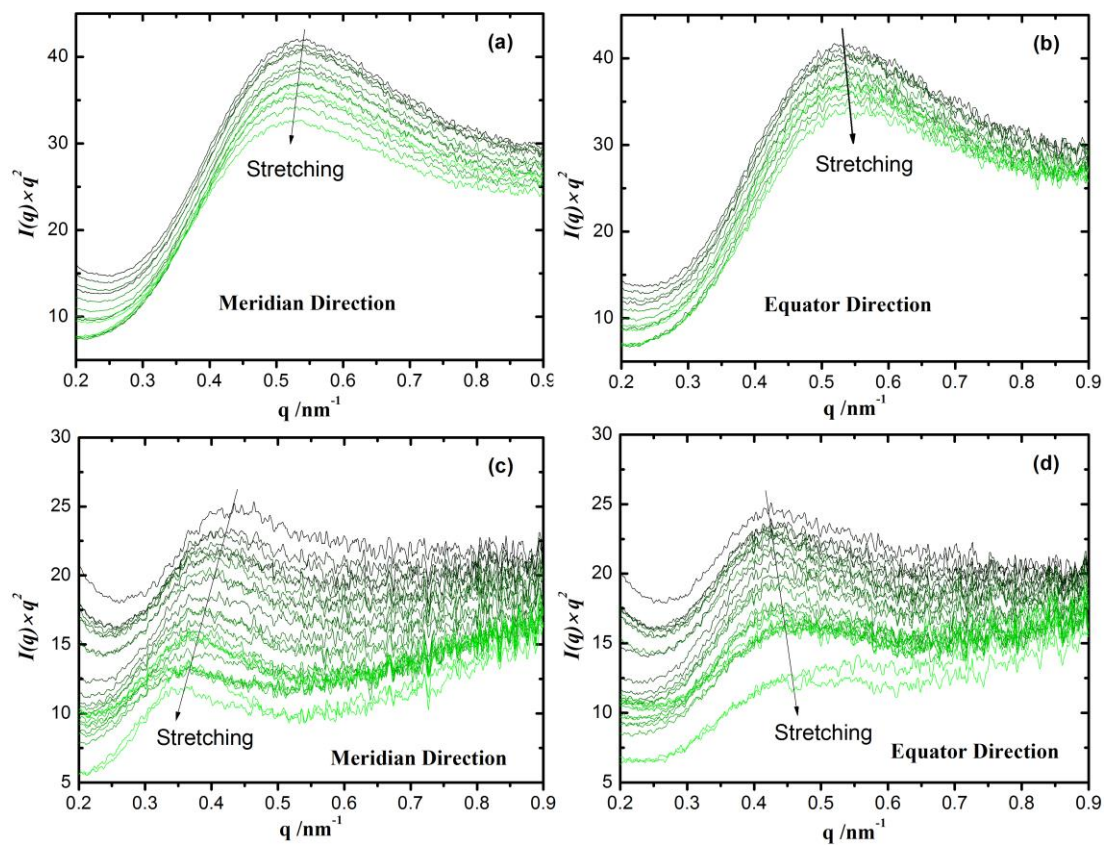

**Figure S8.** Lorentz corrected SAXS profiles of P3DDT under uniaxial stretching at 30 °C (a)-(b) and 110 °C (c)-(d).

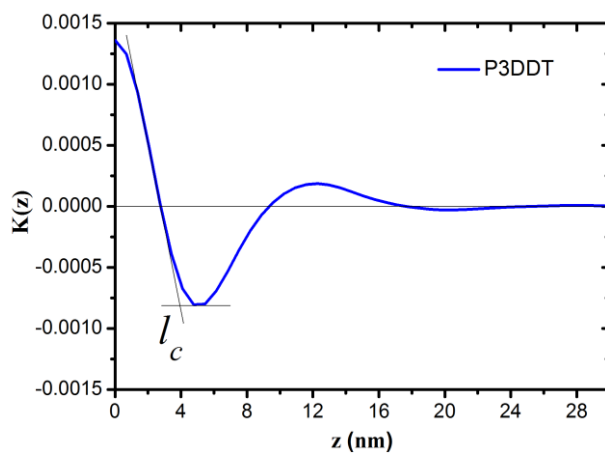

**Figure S9.** A typical one-dimensional electron density correlation function of unstretched P3DDT at 30 °C.  $l_c$  is crystalline layer thickness, which can be estimated from the correlation function curve.

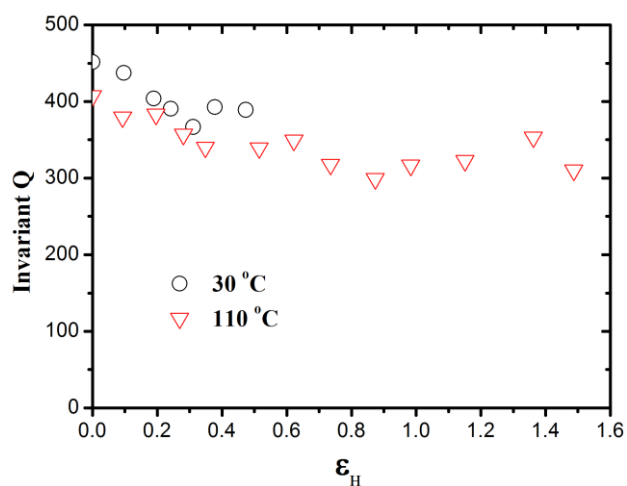

**Figure S10.** Scattering Invariant  $Q$  as a function of true strain ( $\epsilon_H$ ) at different temperatures.

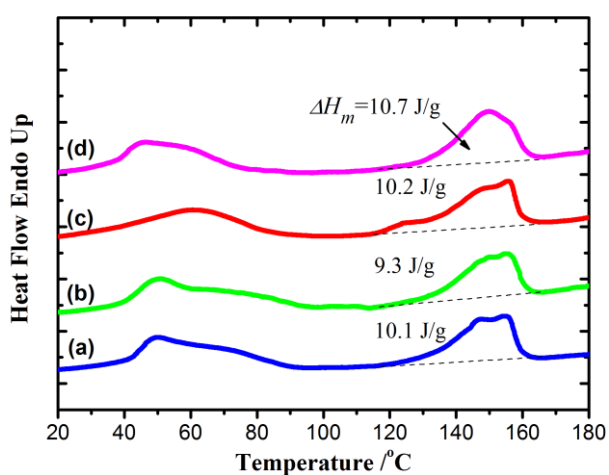

**Figure S11.** DSC curves of P3DDT before and after stretching. (a) and (c) are annealed at 30 °C and 110 °C for 30 min before stretching, respectively. (b) and (d) are after stretching at 30 °C and 110 °C, respectively. DSC measurements were carried out on a Q2000 DSC (TA Instruments). Temperature scans were performed within the range of 0 °C to 200 °C. Around 4 mg sample were used for measurement. The instrument was calibrated with indium.
